# Supplementary material for: Changes in CSF Surface Tension in Relation to Surfactant Proteins in Children with Intraventricular Hemorrhage
Source: MDPI journal article supplement (doi:10.3390/brainsci12111440), 2022-10-26
Supplement: s1 [file s1]

## Supplemental Tables

# Changes in CSF Surface Tension in Relation to Surfactant Proteins in Children with Intraventricular Hemorrhage

Rieka M. Reger <sup>1</sup>, Anton Meinicke <sup>2</sup>, Wolfgang Härtig <sup>2</sup>, Matthias Knüpfer <sup>3</sup>, Ulrich Thome <sup>3</sup>, Stefan Schob <sup>4</sup> and Matthias Krause <sup>1,\*</sup>

**Table S1: Overview of patients and probands with analyzed clinical factors and laboratory parameters**

| N                   | group 1 | group 2 | group 3 | group 4 | group 5 | group 6 | total |
|---------------------|---------|---------|---------|---------|---------|---------|-------|
| CSF Surface Tension | 24      | 14      | 14      | 14      | 7       | 37      | 110   |
| SP-A                | 10      | 6       | 6       | 3       | 1       | 32      | 58    |
| SP-B                | 10      | 6       | 5       | 3       | 1       | 32      | 57    |
| SP-C                | 18      | 10      | 11      | 3       | 4       | 33      | 79    |
| SP-D                | 10      | 6       | 6       | 3       | 1       | 32      | 58    |
| SP-G                | 22      | 13      | 14      | 14      | 7       | 36      | 106   |
| Cell Count          | 22      | 14      | 14      | 14      | 6       | 30      | 100   |
| Glucose             | 22      | 14      | 13      | 14      | 7       | 29      | 99    |
| Lactate             | 21      | 12      | 12      | 13      | 5       | 29      | 92    |
| Total CSF Protein   | 23      | 14      | 13      | 12      | 7       | 31      | 100   |
| Age                 | 24      | 14      | 14      | 14      | 7       | 37      | 110   |

**Table S2: ANOVA test**

| Between groups 1, 2, 3, 4, 5, 6 | Significance |
|---------------------------------|--------------|
| ST                              | <0.001       |
| SP-A                            | <0.001       |
| SP-B                            | <0.001       |
| SP-C                            | 0.007        |
| SP-D                            | <0.001       |
| SP-G                            | <0.001       |
| CC                              | 0.051        |
| Lac                             | <0.001       |
| Glu                             | <0.001       |
| Prot mg/l                       | <0.001       |

**Abbreviations: ST: surface tension; CC: cell count; Lac: lactate; Glu: glucose; Prot: total CSF protein**

**Table S3: Kruskal-Wallis test**

| Between groups 1, 2, 3, 4, 5, 6 | Significance |
|---------------------------------|--------------|
| ST                              | <0.001       |
| SP-A                            | <0.001       |
| SP-B                            | <0.001       |
| SP-C                            | 0.002        |
| SP-D                            | <0.001       |
| SP-G                            | <0.001       |
| CC                              | <0.001       |
| Lac                             | <0.001       |
| Glu                             | <0.001       |
| Prot mg/l                       | <0.001       |

**Abbreviations: ST: surface tension; CC: cell count; Lac: lactate; Glu: glucose; Prot: total CSF protein**

**Table S4: Post-hoc-tests - Tukey and Dunnett test for ST, SP-G, SP-C, cell count, lactate, glucose, total CSF protein**

| Multiple comparison |                                     |               |                            |
|---------------------|-------------------------------------|---------------|----------------------------|
| Dependent Variable  |                                     | (I) Group_no. | (J) Group_no. Significance |
| ST                  | Tukey-HSD                           | 1             | 2 0.984                    |
|                     |                                     |               | 3 0.009                    |
|                     |                                     |               | 4 <0.001                   |
|                     |                                     |               | 5 <0.001                   |
|                     |                                     |               | 6 <0.001                   |
|                     | Dunnett-T<br>(2-sided) <sup>b</sup> | 2             | 1 0.952                    |
|                     |                                     | 3             | 1 0.004                    |
|                     |                                     | 4             | 1 <0.001                   |
|                     |                                     | 5             | 1 <0.001                   |
|                     |                                     | 6             | 1 <0.001                   |
| SP-G                | Tukey-HSD                           | 1             | 2 0.339                    |
|                     |                                     |               | 3 0.002                    |
|                     |                                     |               | 4 <0.001                   |
|                     |                                     |               | 5 0.793                    |
|                     |                                     |               | 6 <0.001                   |
|                     | Dunnett-T<br>(2-sided) <sup>b</sup> | 2             | 1 0.182                    |
|                     |                                     | 3             | 1 <0.001                   |
|                     |                                     | 4             | 1 <0.001                   |
|                     |                                     | 5             | 1 0.607                    |
|                     |                                     | 6             | 1 <0.001                   |
| SP-C                | Tukey-HSD                           | 1             | 2 1.00                     |
|                     |                                     |               | 3 0.527                    |
|                     |                                     |               | 4 0.929                    |
|                     |                                     |               | 5 0.657                    |
|                     |                                     |               | 6 0.008                    |
|                     | Dunnett-T<br>(2-sided) <sup>b</sup> | 2             | 1 1.00                     |
|                     |                                     | 3             | 1 0.339                    |
|                     |                                     | 4             | 1 0.839                    |
|                     |                                     | 5             | 1 0.465                    |
|                     |                                     | 6             | 1 0.003                    |
| CC                  | Tukey-HSD                           | 1             | 2 0.949                    |
|                     |                                     |               | 3 0.906                    |
|                     |                                     |               | 4 0.843                    |
|                     |                                     |               | 5 0.296                    |
|                     |                                     |               | 6 0.675                    |
|                     |                                     |               | 1 0.675                    |

|      |                                     |   |   |        |
|------|-------------------------------------|---|---|--------|
|      |                                     | 6 | 2 | 0.999  |
|      |                                     |   | 3 | 1.000  |
|      |                                     |   | 4 | 1.000  |
|      |                                     |   | 5 | 0.030  |
|      | Dunnett-T<br>(2-sided) <sup>b</sup> | 2 | 1 | 0.868  |
|      |                                     | 3 | 1 | 0.785  |
|      |                                     | 4 | 1 | 0.681  |
|      |                                     | 5 | 1 | 0.155  |
|      |                                     | 6 | 1 | 0.469  |
|      |                                     |   |   |        |
|      |                                     | 1 | 6 | 0.489  |
|      |                                     | 2 | 6 | 0.998  |
|      |                                     | 3 | 6 | 1.000  |
|      |                                     | 4 | 6 | 1.000  |
|      |                                     | 5 | 6 | 0.012  |
|      |                                     |   |   |        |
| Lac  | Tukey-HSD                           |   | 2 | 1.00   |
|      |                                     |   | 3 | 0.028  |
|      |                                     | 1 | 4 | <0.001 |
|      |                                     |   | 5 | <0.001 |
|      |                                     |   | 6 | <0.001 |
|      |                                     |   |   |        |
|      | Dunnett-T<br>(2-sided) <sup>b</sup> | 2 | 1 | 1.00   |
|      |                                     | 3 | 1 | 0.011  |
|      |                                     | 4 | 1 | <0.001 |
|      |                                     | 5 | 1 | <0.001 |
|      |                                     | 6 | 1 | <0.001 |
|      |                                     |   |   |        |
| Glu  | Tukey-HSD                           |   | 2 | 0.371  |
|      |                                     |   | 3 | 0.158  |
|      |                                     | 1 | 4 | <0.001 |
|      |                                     |   | 5 | <0.001 |
|      |                                     |   | 6 | <0.001 |
|      |                                     |   |   |        |
|      | Dunnett-T<br>(2-sided) <sup>b</sup> | 2 | 1 | 0.206  |
|      |                                     | 3 | 1 | 0.074  |
|      |                                     | 4 | 1 | <0.001 |
|      |                                     | 5 | 1 | <0.001 |
|      |                                     | 6 | 1 | <0.001 |
|      |                                     |   |   |        |
| Prot | Tukey-HSD                           |   | 2 | 0.937  |
|      |                                     |   | 3 | 0.884  |
|      |                                     | 1 | 4 | <0.001 |
|      |                                     |   | 5 | 0.538  |
|      |                                     |   | 6 | <0.001 |
|      |                                     |   |   |        |
|      | Dunnett-T<br>(2-sided) <sup>b</sup> | 2 | 1 | 0.847  |
|      |                                     | 3 | 1 | 0.751  |
|      |                                     | 4 | 1 | <0.001 |
|      |                                     | 5 | 1 | 0.339  |
|      |                                     | 6 | 1 | <0.001 |
|      |                                     |   |   |        |

|     |                                     |   |   |        |
|-----|-------------------------------------|---|---|--------|
| Age | Tukey-HSD                           | 1 | 2 | 1.00   |
|     |                                     |   | 3 | 1.00   |
|     |                                     |   | 4 | 0.999  |
|     |                                     |   | 5 | 1.00   |
|     |                                     |   | 6 | <0.001 |
|     |                                     | 6 | 1 | <0.001 |
|     |                                     |   | 2 | <0.001 |
|     |                                     |   | 3 | <0.001 |
|     |                                     |   | 4 | <0.001 |
|     |                                     |   | 5 | <0.001 |
|     | Dunnett-T<br>(2-sided) <sup>b</sup> | 2 | 1 | 1.00   |
|     |                                     | 3 | 1 | 1.00   |
|     |                                     | 4 | 1 | 0.998  |
|     |                                     | 5 | 1 | 1.00   |
|     |                                     | 6 | 1 | <0.001 |

**Abbreviations: ST: surface tension; CC: cell count; Lac: lactate; Glu: glucose; Prot: total CSF protein**

**Table S5: Post-hoc-tests - Tukey and Dunnett test for SP-A, SP-B, SP-D**

| Dependent Variable |                                  | (I) group-no. | (J) group-no. | Significance |
|--------------------|----------------------------------|---------------|---------------|--------------|
| SP-D ng/ml         | Tukey-HSD                        |               | 2             | 0.997        |
|                    |                                  |               | 3             | 0.027        |
|                    |                                  | 1             | 4             | 0.005        |
|                    |                                  |               | 6             | <0.001       |
|                    | Dunnett-T (2-sided) <sup>b</sup> | 2             | 1             | 0.991        |
|                    |                                  | 3             | 1             | 0.013        |
|                    |                                  | 4             | 1             | 0.002        |
|                    |                                  | 6             | 1             | <0.001       |
| SP-B ng/ml         | Tukey-HSD                        |               | 2             | 0.980        |
|                    |                                  |               | 3             | 0.999        |
|                    |                                  | 1             | 4             | 0.047        |
|                    |                                  |               | 6             | <0.001       |
|                    | Dunnett-T (2-sided) <sup>b</sup> | 2             | 1             | 0.953        |
|                    |                                  | 3             | 1             | 0.998        |
|                    |                                  | 4             | 1             | 0.023        |
|                    |                                  | 6             | 1             | <0.001       |
| SP-A ng/ml         | Tukey-HSD                        |               | 2             | 0.964        |
|                    |                                  |               | 3             | 0.953        |
|                    |                                  | 1             | 4             | 0.017        |
|                    |                                  |               | 6             | <0.001       |
|                    | Dunnett-T (2-sided) <sup>b</sup> | 2             | 1             | 0.918        |
|                    |                                  | 3             | 1             | 0.898        |
|                    |                                  | 4             | 1             | 0.008        |
|                    |                                  | 6             | 1             | <0.001       |

**Abbreviations: ST: surface tension; CC: cell count; Lac: lactate; Glu: glucose; Prot: total CSF protein**

**Table S6: Spearman-Rho test for correlations of age with ST and SPs in the control group**

|              |     |                         | Correlations |        |        |            |            |            |            |
|--------------|-----|-------------------------|--------------|--------|--------|------------|------------|------------|------------|
|              |     |                         | Age          | ST     | SP-G   | SP-D ng/ml | SP-C ng/ml | SP-B ng/ml | SP-A ng/ml |
| Spearman-Rho | Age | correlation coefficient | 1.000        | -0.168 | -0.122 | 0.276      | -0.274     | 0.195      | 0.559**    |
|              |     | Significance (2-sided)  | .            | 0.320  | 0.480  | 0.126      | 0.123      | 0.284      | <.001      |
|              |     | N                       | 37           | 37     | 36     | 32         | 33         | 32         | 32         |

\*\* significance <0.001

**Abbreviations: ST: surface tension; CC: cell count; Lac: lactate; Glu: glucose; Prot: total CSF protein**
